# Supplementary material for: miRNA‐Gene Interaction Network Construction Strategy to Discern Promising Traditional Chinese Medicine against Osteoporosis
Source: Hindawi journal article supplement (doi:10.1155/2022/9093614), 2022-01-01

Supplementary Table 1. The 38 KEGG pathways enrichment for 17 osteoporosis-associated miRNAs with DIANA Tools.

| KEGG pathway                                                            | p-value     | #genes | #miRNAs |
|-------------------------------------------------------------------------|-------------|--------|---------|
| Hippo signaling pathway                                                 | 5.91E-06    | 57     | 12      |
| ErbB signaling pathway                                                  | 0.000213425 | 39     | 11      |
| Sulfur metabolism                                                       | 0.001881816 | 5      | 4       |
| Glioma                                                                  | 0.001881816 | 26     | 10      |
| Morphine addiction                                                      | 0.001881816 | 38     | 11      |
| Amphetamine addiction                                                   | 0.001881816 | 26     | 12      |
| Wnt signaling pathway                                                   | 0.001881816 | 48     | 13      |
| Pathways in cancer                                                      | 0.001881816 | 122    | 14      |
| Proteoglycans in cancer                                                 | 0.001881816 | 70     | 14      |
| Thyroid hormone signaling pathway                                       | 0.001989269 | 41     | 11      |
| GABAergic synapse                                                       | 0.002041831 | 32     | 10      |
| Adherens junction                                                       | 0.002106311 | 27     | 8       |
| Glycosaminoglycan biosynthesis - chondroitin sulfate / dermatan sulfate | 0.002838718 | 7      | 6       |
| Prostate cancer                                                         | 0.00322482  | 35     | 11      |
| Signaling pathways regulating pluripotency of stem cells                | 0.003401623 | 49     | 13      |
| AMPK signaling pathway                                                  | 0.004374064 | 43     | 13      |
| Oxytocin signaling pathway                                              | 0.004900824 | 59     | 10      |
| Adrenergic signaling in cardiomyocytes                                  | 0.005511073 | 49     | 12      |
| TGF-beta signaling pathway                                              | 0.00752451  | 29     | 9       |
| Dilated cardiomyopathy                                                  | 0.008399411 | 35     | 11      |
| Chronic myeloid leukemia                                                | 0.016309114 | 27     | 9       |
| Focal adhesion                                                          | 0.016309114 | 69     | 11      |
| Rap1 signaling pathway                                                  | 0.016309114 | 68     | 15      |
| Dorso-ventral axis formation                                            | 0.01688309  | 14     | 6       |
| Arrhythmogenic right ventricular cardiomyopathy (ARVC)                  | 0.01688309  | 30     | 9       |
| Bacterial invasion of epithelial cells                                  | 0.016982288 | 32     | 9       |
| Basal cell carcinoma                                                    | 0.018458213 | 24     | 11      |
| MAPK signaling pathway                                                  | 0.019361511 | 82     | 14      |
| Hypertrophic cardiomyopathy (HCM)                                       | 0.022835931 | 31     | 9       |
| cAMP signaling pathway                                                  | 0.022888002 | 65     | 13      |
| Ras signaling pathway                                                   | 0.022888002 | 71     | 14      |
| Melanogenesis                                                           | 0.023482663 | 35     | 13      |
| Gap junction                                                            | 0.02819419  | 26     | 10      |
| Steroid biosynthesis                                                    | 0.031068373 | 7      | 5       |
| Colorectal cancer                                                       | 0.032300498 | 22     | 8       |
| PI3K-Akt signaling pathway                                              | 0.042675225 | 100    | 14      |

|                        |             |    |    |
|------------------------|-------------|----|----|
| Axon guidance          | 0.047095019 | 45 | 10 |
| mTOR signaling pathway | 0.047892665 | 23 | 9  |

**Supplementary Figure 1.** Analysis of scale-free network topology for various soft-thresholding powers. A, No outliers were detected in the 30 samples. B, The scale-free fit index and the mean connectivity for various soft-thresholding powers were analyzed and the scale-free topology was checked when  $\beta = 3$ .

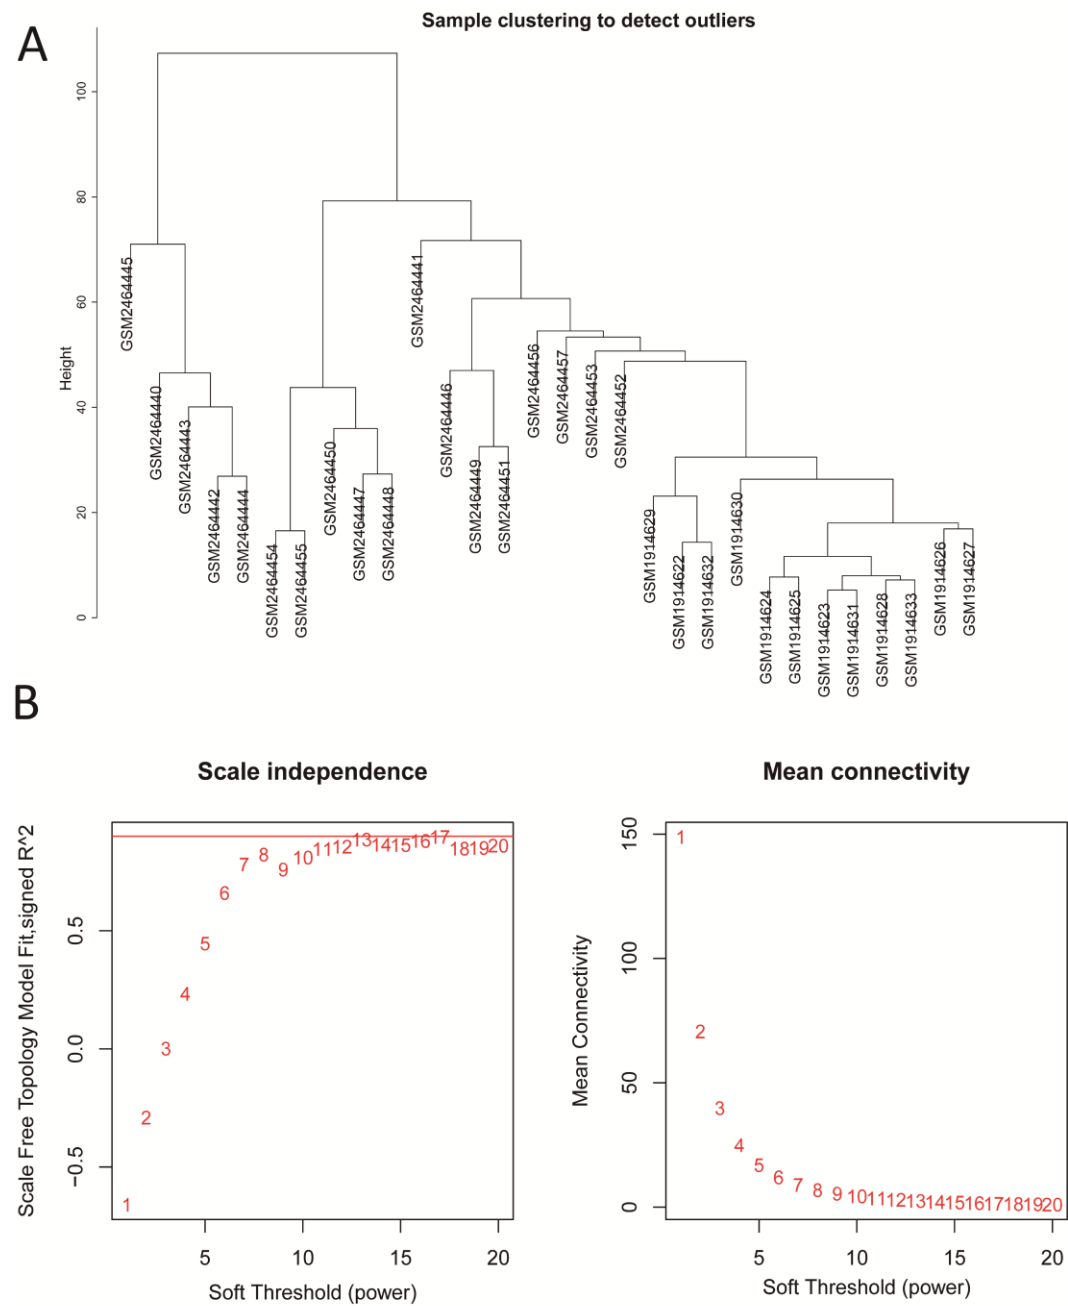

Supplement: f1 [file 9093614.f1.pdf]
